# Supplementary material
Source: PubMed Central journal article supplement (PMC2586299)
Supplement: NIHMS79180-supplement-1.pdf [file NIHMS79180-supplement-1.pdf]

Supplemental Figure 1

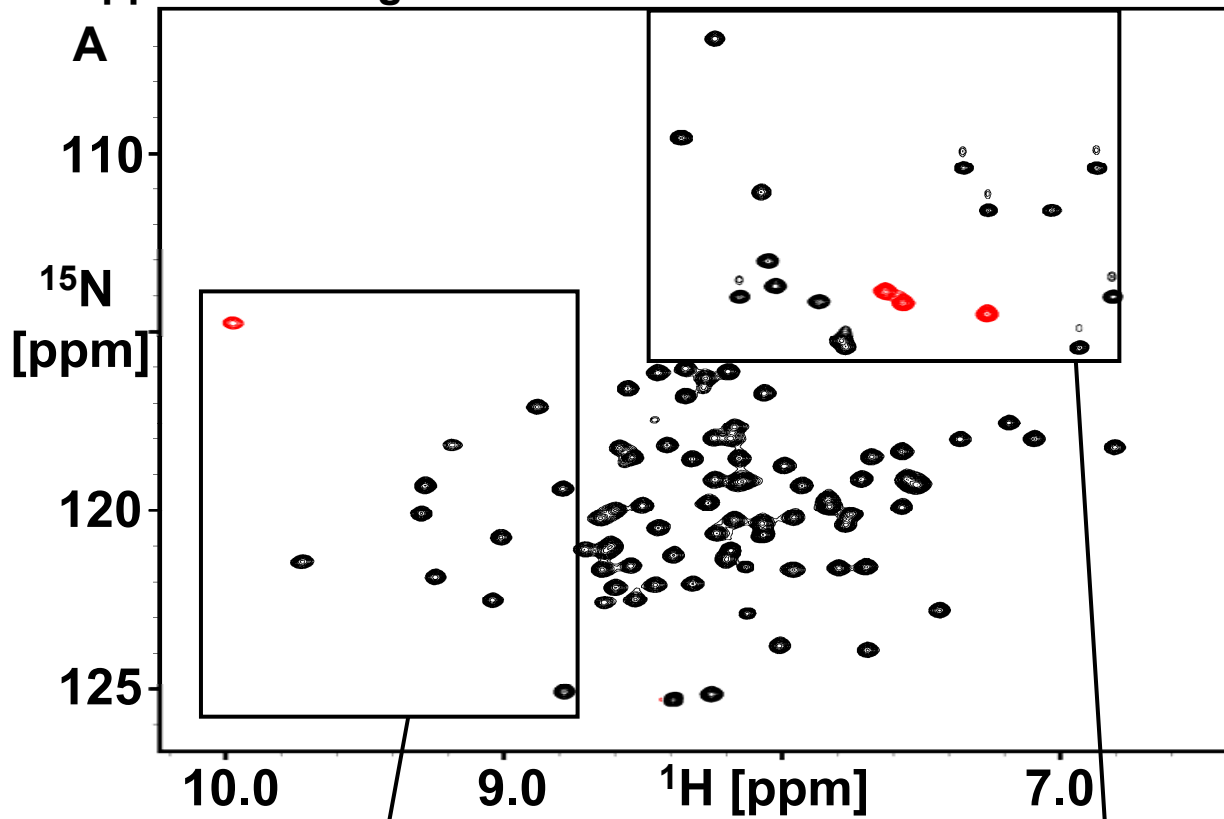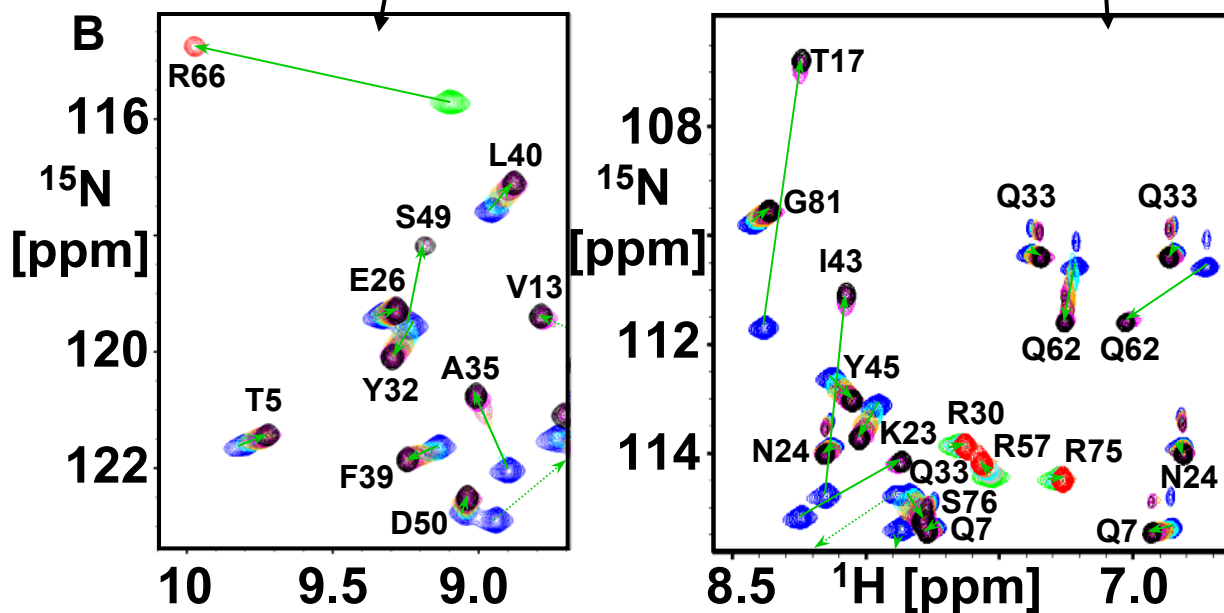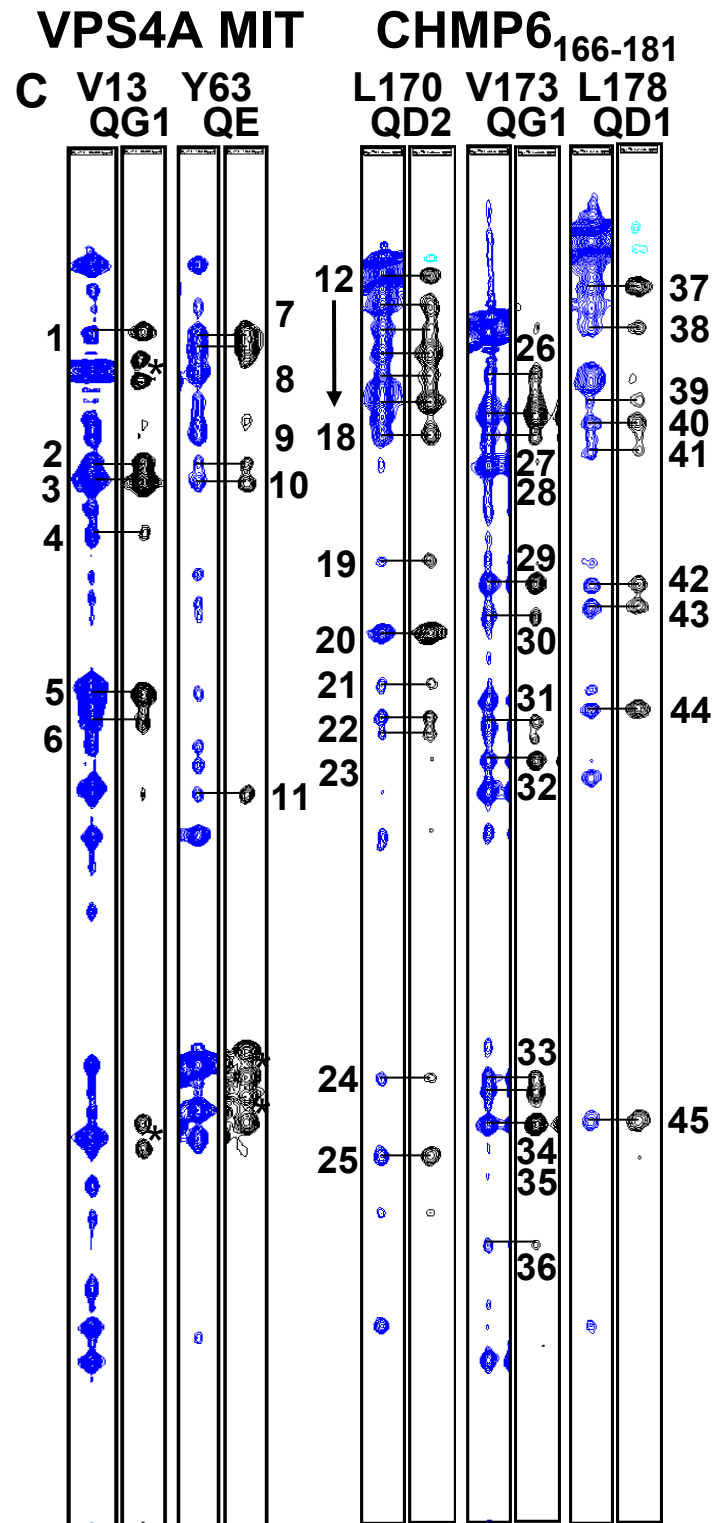

1402-323Mf 009047

## Supplemental Figure 2

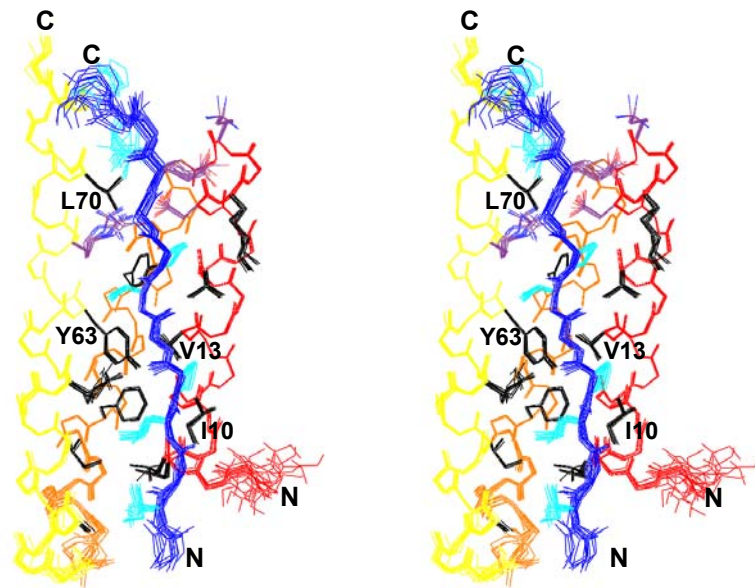

1402-323Mf 009048

**Supplemental Table 1. Measured Dissociation Constants for VPS4 MIT Domain-CHMP Protein Interactions**

| ESCRT-III Construct            | VPS4A MIT<br>K <sub>D</sub> (μM) | VPS4B MIT<br>K <sub>D</sub> (μM) | VPS4A MIT L64D<br>K <sub>D</sub> (μM) | VPS4A MIT V13D<br>K <sub>D</sub> (μM) |
|--------------------------------|----------------------------------|----------------------------------|---------------------------------------|---------------------------------------|
| CHMP6 <sub>1-201</sub>         | 38±7 <sup>a</sup>                | 785(6) <sup>c</sup>              |                                       |                                       |
| CHMP6 <sub>1-181</sub>         | 23.2±0.2 <sup>a</sup>            |                                  | 93.6(7) <sup>c</sup>                  |                                       |
| CHMP6 <sub>150-181</sub>       | 8±1 <sup>b</sup>                 |                                  |                                       |                                       |
| CHMP6 <sub>155-181</sub>       | 7.0±0.1 <sup>b</sup>             |                                  |                                       |                                       |
| CHMP6 <sub>160-181</sub>       | 6.6±0.1 <sup>b</sup>             |                                  |                                       |                                       |
| CHMP6 <sub>165-181</sub>       | 5.8±0.8 <sup>a</sup>             |                                  | 26.1±0.8 <sup>b</sup>                 | >1,000 <sup>b</sup>                   |
| CHMP6 <sub>170-181</sub>       | 8.0±0.1 <sup>b</sup>             |                                  |                                       |                                       |
| CHMP6 <sub>175-181</sub>       | >1,000 <sup>b</sup>              |                                  |                                       |                                       |
| CHMP6 <sub>165-181,L170D</sub> | >1,000 <sup>b</sup>              |                                  |                                       |                                       |
| CHMP6 <sub>165-181,V173D</sub> | >1,000 <sup>b</sup>              |                                  |                                       |                                       |
| CHMP6 <sub>165-181,L178D</sub> | 44.4(2) <sup>c</sup>             |                                  |                                       |                                       |
| CHMP1B <sub>180-196</sub>      | 20±1 <sup>a</sup>                |                                  | >1,000 <sup>a</sup>                   | 23.2±0.7 <sup>b</sup>                 |
| CHMP4A <sub>1-222</sub>        | 384±28 <sup>b</sup>              | 600(6) <sup>c</sup>              |                                       |                                       |
| CHMP4A <sub>188-203</sub>      | 265±7 <sup>b</sup>               |                                  | 893(7) <sup>c</sup>                   |                                       |
| CHMP4B <sub>1-224</sub>        | 204±3 <sup>b</sup>               | 507(3) <sup>c</sup>              |                                       |                                       |
| CHMP4B <sub>187-202</sub>      | 120±15 <sup>b</sup>              |                                  | 360(3) <sup>c</sup>                   |                                       |
| CHMP4C <sub>1-233</sub>        | 810±30 <sup>b</sup>              |                                  |                                       |                                       |
| CHMP4C <sub>181-196</sub>      | 82±11 <sup>b</sup>               |                                  | 248(2) <sup>c</sup>                   |                                       |
| CHMP5 <sub>1-219</sub>         | 180(1) <sup>c</sup>              | 421(2) <sup>c</sup>              |                                       |                                       |

<sup>a</sup>Dissociation constant is the mean of three or more independent measurements and the error is the standard deviation in the measurement.

<sup>b</sup>Dissociation constant is the mean of two independent measurements and the error is the range in the two measurements.

<sup>c</sup>Dissociation constant and error were estimated from a statistical fit of a single binding isotherm derived from triplicate measurements at 10 different VPS4A MIT protein concentrations. The number in parentheses represents the error in the last reported digit.

**Supplemental Table 2. Alignment of CHMP6 MIM2 Sequences from 14 Eukaryotic Model Organisms**

| <b>Organism</b>                  | <b>NCBI Accession Number</b> | <b>MIM2 Sequence</b> |
|----------------------------------|------------------------------|----------------------|
| <i>Homo Sapiens</i>              | NP_078867                    | .EQIELPEVPSEPLPEK.   |
| <i>Pongo pygmaeus</i>            | Q5R861                       | .EQIELPEVPSEPLPEK.   |
| <i>Macaca mulatta</i>            | XP_001110906                 | .EQIELPEVPSEPLPEK.   |
| <i>Mus musculus</i>              | NP_001078967                 | .EQMELPEVPSEPLPDR.   |
| <i>Rattus norvegicus</i>         | NP_001099326                 | .EQIELPEVPSEPLPDT.   |
| <i>Xenopus laevis</i>            | Q6NU11                       | .EDLELPEAPSEPLPDT.   |
| <i>Danio rerio</i>               | Q503V0                       | .ADLELPEVPGEELPEV.   |
| <i>Drosophila melanogaster</i>   | NP_726213                    | .KGAQLPDVPTEDLPIP.   |
| <i>Caenorhabditis elegans</i>    | NP_490762                    | .GTVQLPEAPSHELPEA.   |
| <i>Anopheles gambiae</i>         | EAA11586                     | .ISTRLPDVPDEELVLE.   |
| <i>Arabidopsis thaliana</i>      | NP_196488                    | .IVEDMPEVPTTELMPE.   |
| <i>Arabidopsis thaliana</i>      | NP_568980                    | .EKLDLPDVPTKTPVAS.   |
| <i>Leishmania infantum JPCM5</i> | XP_001469630                 | .KLPEMPAVPSQKLPAQ.   |
| <i>Saccharomyces cerevisiae</i>  | NP_013794                    | .STEGLPSLPQGEQTEQ.   |
| <i>Schizosaccharomyces pombe</i> | NP_596691                    | .GVDVLPVPLKNAIPS.    |

CHMP6 protein sequences from 14 model organisms were identified using BLAST searches, and sequence alignments were created in Clustal W (<http://align.genome.jp>) by aligning them with *Homo sapiens* CHMP6 residues 166-181. The percent occurrence of amino acid residues at each position of the aligned CHMP6 MIM2 sequences is shown in Figure 2A.

## Supplemental Table 3. Expression Vectors

### 1A. Bacterial Expression Vectors

| Plasmid Name                                                            | Source         | Reference      | Internal ID | Backbone | Cloning Site | Epitope Tags |
|-------------------------------------------------------------------------|----------------|----------------|-------------|----------|--------------|--------------|
| pGEX2T                                                                  | Amersham       |                | WISP01-69   |          |              | N.GST        |
| pET16B                                                                  | Novagen        |                | WISP01-71   |          |              | N.6XHIS      |
| pAED4                                                                   | Matsudaira Lab |                | WISP07-61   |          |              | N.10XHIS     |
| pET16B-VPS4A <sub>1-84</sub>                                            | AF11215        | A <sup>B</sup> | WISP05-43   | pET16B   | NdeI/BAMHI   | N.6XHIS      |
| pET16B-VPS4A <sub>1-84,L64D</sub>                                       | AF11215        | B <sup>B</sup> | WISP07-120  | pET16B   | NdeI/BAMHI   | N.6XHIS      |
| pGEX2T-VPS4A <sub>1-84</sub>                                            | AF11215        | B <sup>B</sup> | WISP05-60   | pGEX2T   | NdeI/BAMHI   | N.GST        |
| pGEX2T-VPS4A <sub>1-84,L64D</sub>                                       | AF11215        | B <sup>B</sup> | WISP07-117  | pGEX2T   | NdeI/BAMHI   | N.GST        |
| pGEX2T-VPS4A <sub>1-84,V13D</sub> <sup>1</sup>                          | AF11215        |                | WISP08-49   | pGEX2T   | NdeI/BAMHI   | N.GST        |
| pET16B-VPS4B <sub>1-86</sub>                                            | AF038960       | B <sup>B</sup> | WISP04-153  | pET16B   | NdeI/BAMHI   | N.6XHIS      |
| pGEX2T-CHMP6 <sub>1-201</sub> <sup>2</sup>                              | BC010108       |                | WISP07-133  | pGEX2T   | NdeI/BAMHI   | N.GST        |
| pGEX2T-CHMP6 <sub>1-181</sub> <sup>2</sup>                              | BC010109       |                | WISP08-50   | pGEX2T   | NdeI/BAMHI   | N.GST        |
| pGEX2T-CHMP6 <sub>150-181</sub> <sup>2</sup>                            | BC010110       |                | WISP08-51   | pGEX2T   | NdeI/BAMHI   | N.GST        |
| pGEX2T-CHMP6 <sub>155-181</sub> <sup>2</sup>                            | BC010111       |                | WISP08-52   | pGEX2T   | NdeI/BAMHI   | N.GST        |
| pGEX2T-CHMP6 <sub>160-181</sub> <sup>2</sup>                            | BC010112       |                | WISP08-53   | pGEX2T   | NdeI/BAMHI   | N.GST        |
| pGEX2T-CHMP6 <sub>165-181</sub> <sup>2</sup>                            | BC010113       |                | WISP08-54   | pGEX2T   | NdeI/BAMHI   | N.GST        |
| pGEX2T-CHMP6 <sub>170-181</sub> <sup>2</sup>                            | BC010114       |                | WISP08-55   | pGEX2T   | NdeI/BAMHI   | N.GST        |
| pGEX2T-CHMP6 <sub>175-181</sub> <sup>2</sup>                            | BC010115       |                | WISP08-56   | pGEX2T   | NdeI/BAMHI   | N.GST        |
| pGEX2T-CHMP6 <sub>165-181,L170D</sub> <sup>2</sup>                      | BC010117       |                | WISP08-58   | pGEX2T   | NdeI/BAMHI   | N.GST        |
| pGEX2T-CHMP6 <sub>165-181,V173D</sub> <sup>2</sup>                      | BC010118       |                | WISP08-59   | pGEX2T   | NdeI/BAMHI   | N.GST        |
| pGEX2T-CHMP6 <sub>165-181,L178D</sub> <sup>2</sup>                      | BC010118       |                | WISP08-73   | pGEX2T   | NdeI/BAMHI   | N.GST        |
| pGEX2T-CHMP1B <sub>180-196</sub>                                        | AF306520       | B <sup>B</sup> | WISP06-22   | pGEX2T   | NdeI/BAMHI   | N.GST        |
| pAED4-(HIS) <sub>10</sub> -TRPΔLE-CHMP1A <sub>180-196</sub>             | NM_002768      | B <sup>B</sup> | WISP06-62   | pAED4    | NdeI/BAMHI   | N.10XHIS     |
| pAED4-(HIS) <sub>10</sub> -TRPΔLE-CHMP6 <sub>166-181</sub> <sup>3</sup> | BC010116       |                | WISP08-57   | pAED4    | NdeI/BAMHI   | N.10XHIS     |
| pGEX2T-CHMP4A                                                           | BC010893       | D <sup>B</sup> | WISP06-197  | pGEX2T   | NdeI/BAMHI   | N.GST        |
| pGEX2T-CHMP4A <sub>188-203</sub> <sup>7</sup>                           | BC010893       |                | WISP08-74   | pGEX2T   | NdeI/BAMHI   | N.GST        |
| pGEX2T-CHMP4B                                                           | AL050349       | D <sup>B</sup> | WISP07-126  | pGEX2T   | NdeI/BAMHI   | N.GST        |
| pGEX2T-CHMP4B <sub>187-202</sub> <sup>7</sup>                           | AL050349       |                | WISP08-75   | pGEX2T   | NdeI/BAMHI   | N.GST        |
| pGEX2T-CHMP4C                                                           | BC002463       | F <sup>B</sup> | WISP06-200  | pGEX2T   | NdeI/BAMHI   | N.GST        |
| pGEX2T-CHMP4C <sub>181-196</sub> <sup>7</sup>                           | BC002463       |                | WISP08-76   | pGEX2T   | NdeI/BAMHI   | N.GST        |
| pGEX2T-CHMP5 <sup>7</sup>                                               | BC007457       |                | WISP07-144  | pGEX2T   | NdeI/BAMHI   | N.GST        |

## Supplemental Table 3. Expression Vectors (continued)

### 1B. Mammalian Expression Vectors

| Plasmid Name                                              | Source     | Reference      | Internal ID | Backbone                      | Cloning Site | Epitope Tags |
|-----------------------------------------------------------|------------|----------------|-------------|-------------------------------|--------------|--------------|
| pEGFP-C1                                                  | Clontech   |                | WISP98-114  |                               |              | N.EGFP       |
| pcDNA3.1(-)A-myc-HIS                                      | Invitrogen |                | WISP02-257  |                               |              | C.myc.6XHIS  |
| pcDNA3.1(-)B-myc-HIS                                      | Invitrogen |                | WISP03-153  |                               |              | C.myc.6XHIS  |
| pDsRed-C1                                                 | Clontech   |                | WISP02-24   |                               |              | N.DsRed      |
| pEGFP-VPS4A                                               | AF11215    | C <sup>8</sup> | WISP01-111  | pEGFP                         | EcoRI/BAMHI  | N.EGFP       |
| pEGFP-VPS4A <sub>L64D</sub>                               | AF11215    | B <sup>8</sup> | WISP 07-99  | pEGFP-C1                      | EcoRI/BAMHI  | N.EGFP       |
| pEGFP-VPS4A <sub>V13D</sub> <sup>4</sup>                  | AF11215    |                | WISP 08-60  | pEGFP-C1                      | EcoRI/BAMHI  | N.EGFP       |
| pEGFP-VPS4A <sub>L64D,V13D</sub> <sup>4</sup>             | AF11215    |                | WISP 08-61  | pEGFP-C1                      | EcoRI/BAMHI  | N.EGFP       |
| pEGFP-VPS4A <sub>K173Q</sub>                              | AF11215    | C <sup>8</sup> | WISP 01-112 | pEGFP-C1                      | EcoRI/BAMHI  | N.EGFP       |
| pEGFP-VPS4A <sub>K173Q,L64D</sub>                         | AF11215    | B <sup>8</sup> | WISP 07-101 | pEGFP-C1                      | EcoRI/BAMHI  | N.EGFP       |
| pEGFP-VPS4A <sub>K173Q,V13D</sub> <sup>4</sup>            | AF11215    |                | WISP 08-62  | pEGFP-C1                      | EcoRI/BAMHI  | N.EGFP       |
| pEGFP-VPS4A <sub>K173Q,L64D,V13D</sub> <sup>4</sup>       | AF11215    |                | WISP 08-63  | pEGFP-C1                      | EcoRI/BAMHI  | N.EGFP       |
| pDsRed-VPS4B                                              | AF038960   | D <sup>8</sup> | WISP02-25   | pDsRed-C1                     | EcoRI/BAMHI  | N.DsRed      |
| pcDNA3.1-VPS4B <sub>WT</sub> <sup>6</sup>                 | AF038960   |                | WISP 08-72  | pcDNA3.1/ <i>myc</i> -His(-)A | EcoRI/BAMHI  | C.myc.6XHIS  |
| pcDNA3.1-VPS4B <sub>siRes685</sub> <sup>6</sup>           | AF038960   |                | WISP 08-64  | pcDNA3.1/ <i>myc</i> -His(-)A | EcoRI/BAMHI  | C.myc.6XHIS  |
| pcDNA3.1-VPS4BK <sub>180Q,siRes685</sub> <sup>6</sup>     | AF038960   |                | WISP 08-65  | pcDNA3.1/ <i>myc</i> -His(-)A | EcoRI/BAMHI  | C.myc.6XHIS  |
| pcDNA3.1-VPS4 <sub>L66D,siRes685</sub> <sup>6</sup>       | AF038960   |                | WISP 08-66  | pcDNA3.1/ <i>myc</i> -His(-)A | EcoRI/BAMHI  | C.myc.6XHIS  |
| pcDNA3.1-VPS4B <sub>A15D,siRes685</sub> <sup>6</sup>      | AF038960   |                | WISP 08-67  | pcDNA3.1/ <i>myc</i> -His(-)A | EcoRI/BAMHI  | C.myc.6XHIS  |
| pcDNA3.1-VPS4B <sub>A15D,L66D,siRes685</sub> <sup>6</sup> | AF038960   |                | WISP 08-68  | pcDNA3.1/ <i>myc</i> -His(-)A | EcoRI/BAMHI  | C.myc.6XHIS  |
| pcDNA3.1-CHMP6 <sub>WT</sub>                              | BC010108   | E <sup>8</sup> | WISP 04-152 | pcDNA3.1/ <i>myc</i> -His(-)B | EcoRI/BAMHI  | C.myc.6XHIS  |
| pcDNA3.1-CHMP6 <sub>siRes</sub> <sup>5</sup>              | BC010108   |                | WISP 08-69  | pcDNA3.1/ <i>myc</i> -His(-)B | EcoRI/BAMHI  | C.myc.6XHIS  |
| pcDNA3.1-CHMP6 <sub>L170D,siRes</sub> <sup>5</sup>        | BC010108   |                | WISP 08-70  | pcDNA3.1/ <i>myc</i> -His(-)B | EcoRI/BAMHI  | C.myc.6XHIS  |
| pcDNA3.1-CHMP6 <sub>V173D,siRes</sub> <sup>5</sup>        | BC010108   |                | WISP 08-71  | pcDNA3.1/ <i>myc</i> -His(-)B | EcoRI/BAMHI  | C.myc.6XHIS  |

<sup>1</sup>*VPS4A Bacterial Expression Constructs* The VPS4A<sub>1-84,V13D</sub> (WISP 08-49) MIT domain expression construct was mutated via the QuikChange method (Stratagene) using the wild-type VPS4A<sub>1-84</sub> (WISP 05-60) MIT domain pGEX2T (Amersham) plasmid with an engineered TEV protease cleavage site after the N terminal GST tag as the template.

<sup>2</sup>*GST-Tagged CHMP6 Bacterial Expression Constructs* The GST-CHMP6<sub>1-201</sub> construct was amplified from the ATCC template (MGC-19477), digested, and ligated into the (5')NdeI/(3')BamHI sites of the aforementioned modified pGEX-2T plasmid. Truncated GST-tagged CHMP6 constructs (GST-CHMP6<sub>1-181</sub>, WISP 08-50; GST-CHMP6<sub>150-181</sub>, WISP 08-51; GST-CHMP6<sub>155-181</sub>, WISP 08-52; GST-CHMP6<sub>160-181</sub>, WISP 08-53; GST-CHMP6<sub>165-181</sub>, WISP 08-54; GST-CHMP6<sub>170-181</sub>, WISP 08-55; GST-CHMP6<sub>175-181</sub>, WISP 08-56) were amplified from the GST-CHMP6<sub>1-201</sub> template, digested, and ligated into the modified pGEX-2T plasmid by (5')NdeI/(3')BamHI sites. The GST-CHMP6<sub>165-181,L170D</sub> (WISP 08-58), GST-CHMP6<sub>165-181,V173D</sub>, and GST-CHMP6<sub>165-181,V173D</sub> point mutants were created by the QuikChange method using GST-CHMP6<sub>165-181</sub> as the template.

<sup>3</sup>*TRPΔLE CHMP6 Bacterial Expression Constructs* The (His)<sub>10</sub>-TrpΔLE-CHMP6<sub>165-181</sub> (WISP 08-57) expression construct was inserted by the QuikChange method using the (His)<sub>10</sub>-TrpΔLE-CHMP1A<sub>180-196</sub> (WISP 06-62) template plasmid.

<sup>4</sup>*VPS4A Mammalian Expression Constructs* The mammalian expression constructs: pEGFP-VPS4A, pEGFP-VPS4A<sub>L64D</sub>, pEGFP-VPS4A<sub>K173Q</sub>, and pEGFP-VPS4A<sub>L64D,K173Q</sub> were previously described (Garrus *et al.*, 2001; 2003; Stuchell-Brereton *et al.*, 2007). Additional pEGFP-VPS4A mutants: pEGFP-VPS4A<sub>V13D</sub> (WISP 08-60), pEGFP-VPS4A<sub>L64D,V13D</sub> (WISP 08-61), pEGFP-VPS4A<sub>K173Q,V13D</sub> (WISP 08-62), and pEGFP-VPS4A<sub>K173Q,L64D,V13D</sub> (WISP 08-63) were mutated via QuikChange using the templates pEGFP-VPS4A (WISP 01-111), pEGFP-VPS4A<sub>L64D</sub> (WISP 07-99), pEGFP-VPS4A<sub>K173Q</sub> (WISP 01-112), and pEGFP-VPS4A<sub>L64D,K173Q</sub> (WISP 07-101), respectively.

<sup>5</sup>*siRNA Resistant CHMP6 Mammalian Expression Constructs* Wild-type siRNA resistant myc-HIS tagged CHMP6 (pcDNA3.1-CHMP6<sub>WT,siRes</sub>, WISP 08-69) was mutated by the QuikChange method using pcDNA3.1-CHMP6<sub>WT</sub> (WISP 04-152) as the template. siRNA resistant CHMP6 point mutants (pcDNA3.1-CHMP6<sub>L170D,siRes</sub>, WISP 08-70) and pcDNA3.1-CHMP6<sub>V173D,siRes</sub>, WISP 08-71) were mutated by QuikChange using pcDNA3.1-CHMP6<sub>WT,siRes</sub> (WISP 08-69) as the template.

<sup>6</sup>*siRNA Resistant VPS4B Constructs* VPS4B was sub-cloned from pDsRed-VPS4B (WISP 02-25) into pcDNA3.1/*myc*-His(-)A (Invitrogen) using (5') EcoRI / (3')BAMHI restriction sites to make pcDNA3.1-VPS4B<sub>WT</sub> (WISP 08-72). Wild-type siRNA resistant myc-HIS

### Supplemental Table 3. Expression Vectors (continued)

tagged VPS4B (pcDNA3.1-VPS4B<sub>siRes685</sub>, WISP 08-64) was cloned by the QuikChange method using pcDNA3.1-VPS4B<sub>WT</sub> (WISP 08-72) as a template. siRNA resistant VPS4B point mutants (pcDNA3.1-VPS4B<sub>A15D,siRes685</sub>, WISP 08-67; pcDNA3.1-VPS4B<sub>L66D,siRes685</sub>, WISP 08-66; and pcDNA3.1-VPS4B<sub>K180Q,siRes685</sub>, WISP 08-65) were mutated by QuikChange using pcDNA3.1-VPS4B<sub>siRes685</sub> (WISP 08-72) as the template. The siRNA resistant VPS4B<sub>A15D,L66D</sub> double point mutant (pcDNA3.1-VPS4B<sub>BA15D,L66D-siRes685</sub>, WISP 08-68) was created via QuikChange using pcDNA3.1-VPS4B<sub>L66D,siRes685</sub> (WISP 08-66) as the template.

<sup>7</sup>*GST tagged CHMP4A, B, C and CHMP5 Bacterial Expression Constructs* GST tagged CHMP4A, CHMP4B, and CHMP4C were previously described (von Schwedler, 2003; McCullough, 2008). CHMP5 was amplified from a cDNA template (ATCC# MGC-12181), digested, and ligated into the (5')NdeI/(3')BamHI sites of the aforementioned modified pGEX-2T to make GST-CHMP5 (WISP 07-144). The regions of CHMP4A, CHMP4B, and CHMP4C corresponding to the CHMP6 MIM2 sequence were amplified from their respective full-length GST tagged constructs. PCR products were digested and ligated into pGEX-2T via (5')NdeI/(3')BamHI restriction sites to make GST-CHMP4A<sub>188-203</sub> (WISP 08-74), GST-CHMP4B<sub>187-202</sub> (WISP 08-75), GST-CHMP4C<sub>181-196</sub> (WISP 08-76).

<sup>8</sup>*References for previously cloned constructs:* A) Scott, A., Gaspar, J., Stuchell-Brereton, M.D., Alam, S.L., Skalicky, J.J., and Sundquist, W.I. (2005b). Structure and ESCRT-III protein interactions of the MIT domain of human VPS4A. *Proc Natl Acad USA* 102, 13813-13818. B) Stuchell-Brereton, M.D., Skalicky, J.J., Kieffer, C., Karren, M.A., Ghaffarian, S., and Sundquist, W.I. (2007). ESCRT-III recognition by VPS4 ATPases. *Nature* 449, 740-744. C) Garrus, J.E., von Schwedler, U.K., Pornillos, O.W., Morham, S.G., Zavitz, K.H., Wang, H.E., Wettstein, D.A., Stray, K.M., Cote, M., Rich, R.L., *et al.* (2001). Tsg101 and the vacuolar protein sorting pathway are essential for HIV-1 budding. *Cell* 107, 55-65. D) von Schwedler, U.K., Stuchell, M., Muller, B., Ward, D.M., Chung, H.Y., Morita, E., Wang, H.E., Davis, T., He, G.P., Cimbora, D.M., *et al.* (2003). The protein network of HIV budding. *Cell* 114, 701-713. E) Langelier, C., von Schwedler, U.K., Fisher, R.D., De Domenico, I., White, P.L., Hill, C.P., Kaplan, J., Ward, D., and Sundquist, W.I. (2006). Human ESCRT-II complex and its role in human immunodeficiency virus type 1 release. *J Virol* 80, 9465-9480. F) McCullough, J., Fisher, R., Whitby, F.G., Sundquist, W.I., and Hill, C.P. (2008). CHMP4-ALIX interactions in the human ESCRT pathway. *Proceedings of the National Academy of Science, USA*, in press.
